# Supplementary material for: Knockdown of Atg7 suppresses Tumorigenesis in a murine model of liver cancer
Source: PubMed Central journal article supplement — Transl Oncol. 2021 Jun 23;14(9):101158. doi: 10.1016/j.tranon.2021.101158 (PMC8243000; doi:10.1016/j.tranon.2021.101158), 2021-06-23
Supplement: mmc2.pdf [file mmc2.pdf]

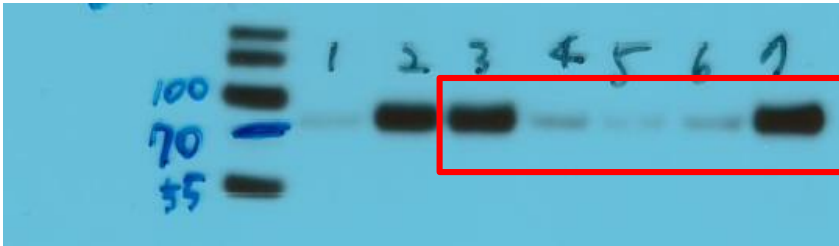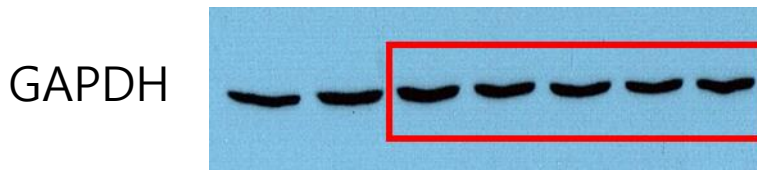

**Supplementary Figure 1.** Uncropped blot images shown in Figure 1C

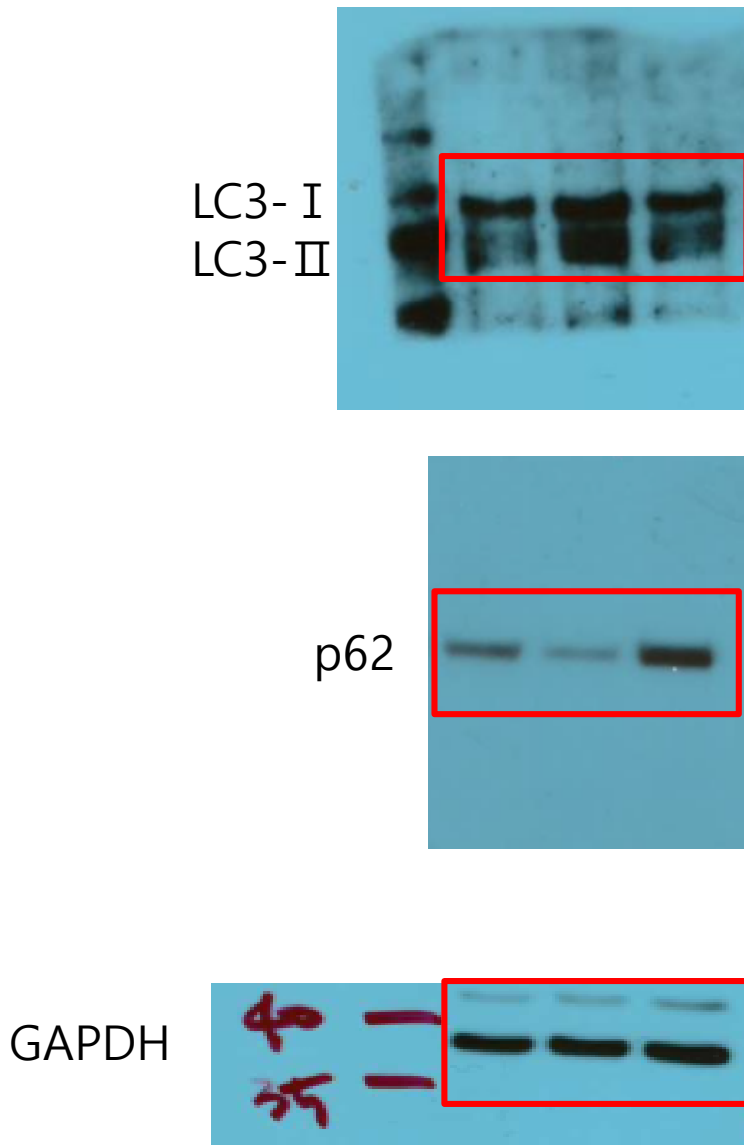

**Supplementary Figure 2.** Full-length blot images shown in Figure 2C.

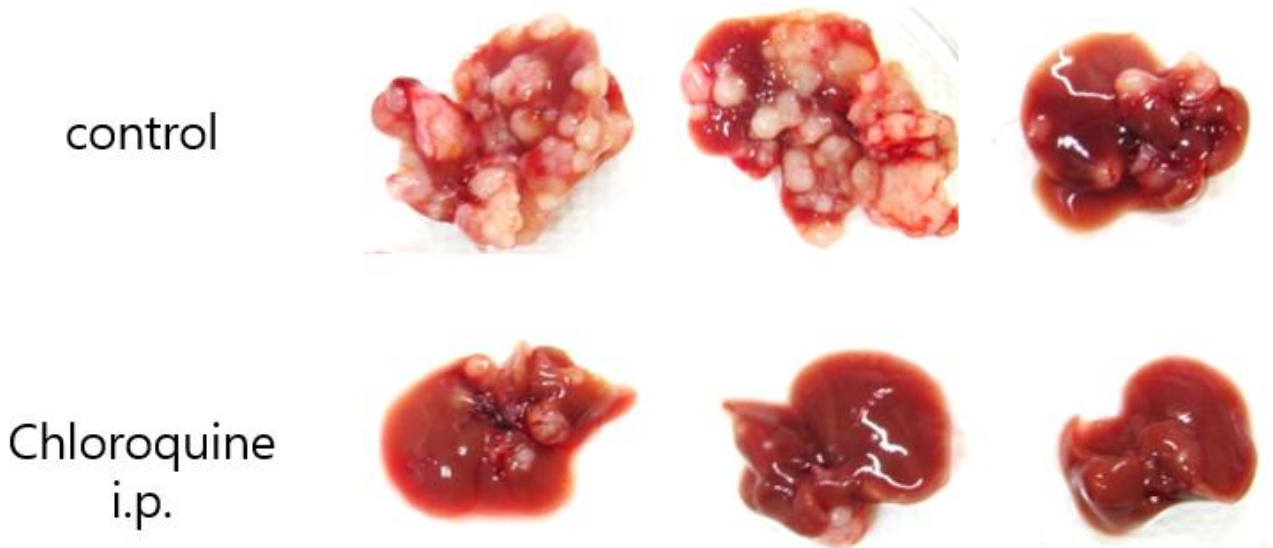

**Supplementary Figure 3.** Gross images of representative livers. Mice were treated with chloroquine at a daily dose of 100mg/kg body weight for 5 weeks following hydrodynamic tail vein injection. Ten mice were used for each group. Control mice were treated with PBS.

## Supplementary Figure 4

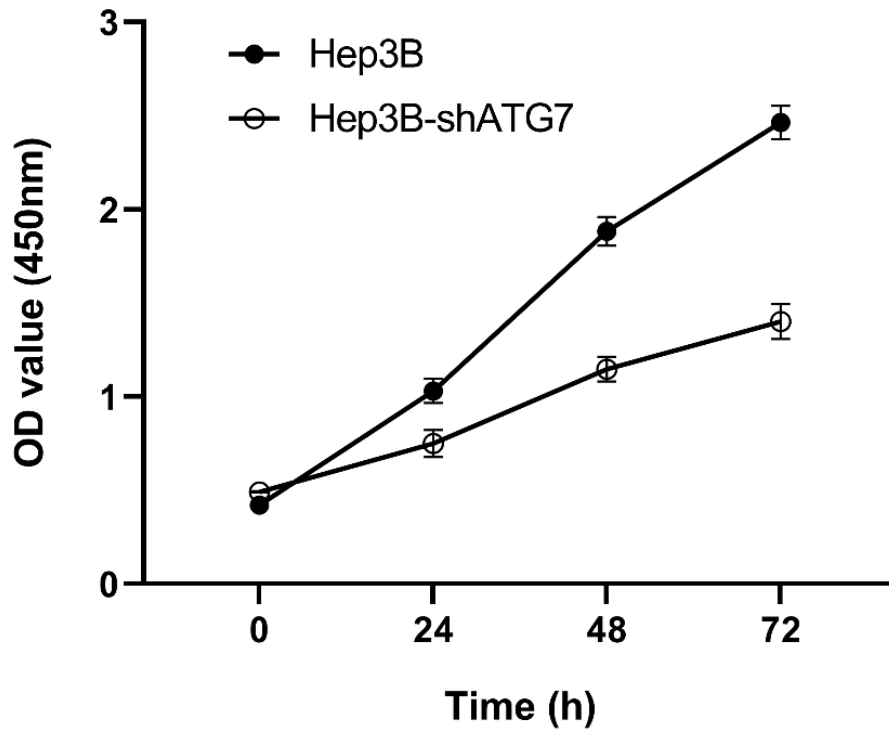

**Supplementary Figure 4.** Cell proliferation assay of Hep3B cells stably expressing ATG7 shRNA and control shRNA. Cells were seeded at a density of 5,000 cells per well in a 96-well flat-bottomed plate and an MTT assay was performed by adding WST mixture (Cell Viability, Proliferation & Cytotoxicity Assay kit, DOGEN, Korea) at the indicated time points.
